# Supplementary material for: Association between Hepatic Venous Congestion and Adverse Outcomes after Cardiac Surgery
Source: MDPI journal article supplement (doi:10.3390/diagnostics12123175), 2022-12-15
Supplement: s1 [file s1]

## CONSORT 2010 checklist of information to include when reporting a randomised trial\*

| Section/Topic                    | Item No | Checklist item                                                                                                                                                                              | Reported on page No |
|----------------------------------|---------|---------------------------------------------------------------------------------------------------------------------------------------------------------------------------------------------|---------------------|
| <b>Title and abstract</b>        |         |                                                                                                                                                                                             |                     |
|                                  | 1a      | Identification as a randomised trial in the title                                                                                                                                           | 1                   |
|                                  | 1b      | Structured summary of trial design, methods, results, and conclusions (for specific guidance see CONSORT for abstracts)                                                                     | 1-2                 |
| <b>Introduction</b>              |         |                                                                                                                                                                                             |                     |
| Background and objectives        | 2a      | Scientific background and explanation of rationale                                                                                                                                          | 2                   |
|                                  | 2b      | Specific objectives or hypotheses                                                                                                                                                           | 2                   |
| <b>Methods</b>                   |         |                                                                                                                                                                                             |                     |
| Trial design                     | 3a      | Description of trial design (such as parallel, factorial) including allocation ratio                                                                                                        | 3                   |
|                                  | 3b      | Important changes to methods after trial commencement (such as eligibility criteria), with reasons                                                                                          | 3-4                 |
| Participants                     | 4a      | Eligibility criteria for participants                                                                                                                                                       | 3                   |
|                                  | 4b      | Settings and locations where the data were collected                                                                                                                                        | 3                   |
| Interventions                    | 5       | The interventions for each group with sufficient details to allow replication, including how and when they were administered                                                                | 5                   |
| Outcomes                         | 6a      | Completely defined pre-specified primary and secondary outcome measures, including how and when they were assessed                                                                          | 6                   |
|                                  | 6b      | Any changes to trial outcomes after the trial commenced, with reasons                                                                                                                       | 5                   |
| Sample size                      | 7a      | How sample size was determined                                                                                                                                                              | 4                   |
|                                  | 7b      | When applicable, explanation of any interim analyses and stopping guidelines                                                                                                                | -                   |
| Randomisation:                   |         |                                                                                                                                                                                             |                     |
| Sequence generation              | 8a      | Method used to generate the random allocation sequence                                                                                                                                      | -                   |
|                                  | 8b      | Type of randomisation; details of any restriction (such as blocking and block size)                                                                                                         | -                   |
| Allocation concealment mechanism | 9       | Mechanism used to implement the random allocation sequence (such as sequentially numbered containers), describing any steps taken to conceal the sequence until interventions were assigned | -                   |
| Implementation                   | 10      | Who generated the random allocation sequence, who enrolled participants, and who assigned participants to interventions                                                                     | -                   |
| Blinding                         | 11a     | If done, who was blinded after assignment to interventions (for example, participants, care providers, those assessing outcomes) and how                                                    | 5                   |
|                                  | 11b     | If relevant, description of the similarity of interventions                                                                                                                                 | -                   |
| Statistical methods              | 12a     | Statistical methods used to compare groups for primary and secondary outcomes                                                                                                               | 4                   |
|                                  | 12b     | Methods for additional analyses, such as subgroup analyses and adjusted analyses                                                                                                            | 4                   |
| <b>Results</b>                   |         |                                                                                                                                                                                             |                     |

|                                                      |     |                                                                                                                                                   |               |
|------------------------------------------------------|-----|---------------------------------------------------------------------------------------------------------------------------------------------------|---------------|
| Participant flow (a diagram is strongly recommended) | 13a | For each group, the numbers of participants who were randomly assigned, received intended treatment, and were analysed for the primary outcome    | 5             |
|                                                      | 13b | For each group, losses and exclusions after randomisation, together with reasons                                                                  | 5             |
| Recruitment                                          | 14a | Dates defining the periods of recruitment and follow-up                                                                                           | 5             |
|                                                      | 14b |                                                                                                                                                   |               |
| Baseline data                                        | 15  | A table showing baseline demographic and clinical characteristics for each group                                                                  | 6             |
| Numbers analysed                                     | 16  | For each group, number of participants (denominator) included in each analysis and whether the analysis was by original assigned groups           | 4-5           |
| Outcomes and estimation                              | 17a | For each primary and secondary outcome, results for each group, and the estimated effect size and its precision (such as 95% confidence interval) | 6-9           |
|                                                      | 17b | For binary outcomes, presentation of both absolute and relative effect sizes is recommended                                                       | -             |
| Ancillary analyses                                   | 18  | Results of any other analyses performed, including subgroup analyses and adjusted analyses, distinguishing pre-specified from exploratory         | 8-10          |
| Harms                                                | 19  | All important harms or unintended effects in each group (for specific guidance see CONSORT for harms)                                             | -             |
| <b>Discussion</b>                                    |     |                                                                                                                                                   |               |
| Limitations                                          | 20  | Trial limitations, addressing sources of potential bias, imprecision, and, if relevant, multiplicity of analyses                                  | 10            |
| Generalisability                                     | 21  | Generalisability (external validity, applicability) of the trial findings                                                                         | 10            |
| Interpretation                                       | 22  | Interpretation consistent with results, balancing benefits and harms, and considering other relevant evidence                                     | 10            |
| <b>Other information</b>                             |     |                                                                                                                                                   |               |
| Registration                                         | 23  | Registration number and name of trial registry                                                                                                    | 3             |
| Protocol                                             | 24  | Where the full trial protocol can be accessed, if available                                                                                       | related files |
| Funding                                              | 25  | Sources of funding and other support (such as supply of drugs), role of funders                                                                   | 1             |

\*Reference: [www.consort-statement.org](http://www.consort-statement.org).

#### Supplement S1: Consort checklist

|            | non-VTI growth<br>(n=17) | VTI growth<br>(n=24) | p     |
|------------|--------------------------|----------------------|-------|
| Pre A (cm) | 9.1 (7.7)                | 8.8 (5.3)            | 0.434 |
| Pre S (cm) | 12.2 (9.9)               | 13.9 (9.9)           | 0.275 |
| Pre V (cm) | 6.4 (4.3)                | 5.3 (4.5)            | 0.209 |

|                 |              |             |       |
|-----------------|--------------|-------------|-------|
| Pre D (cm)      | 8.6 (4.2)    | 13.3 (6.7)  | 0.026 |
| Pre VTI ratio   | 1.01 (0.02)  | 0.59 (0.01) | 0.098 |
| Post A (cm)     | 8.5 (5.7)    | 9.8 (5.6)   | 0.239 |
| Post S (cm)     | 14.6 (9.0)   | 12.4 (8.1)  | 0.22  |
| Post V (cm)     | 6.9 (4.1)    | 7.5 (6.6)   | 0.375 |
| Post D (cm)     | 10.1 (7.3)   | 10.1 (6.9)  | 0.425 |
| Post VTI ratio  | 0.65 (0.03)  | 0.91 (0.03) | 0.087 |
| Delta A (cm)    | -0.64 (0.01) | 0.99 (0.05) | 0.08  |
| Delta S (cm)    | 2.5 (1.1)    | -1.4 (0.02) | 0.08  |
| Delta V (cm)    | -0.01 (0.01) | 2.28 (1.2)  | 0.117 |
| Delta D (cm)    | 1.3 (0.2)    | -2.2 (1.2)  | 0.007 |
| Delta VTI ratio | -0.35 (0.01) | 0.31 (0.02) | 0.002 |

Pre: Preoperative

Post: Postoperative

Supplement S2: Hepatic venous flow

|                     | non-VTI<br>growth<br>(n=17) | VTI growth<br>(n=24) | p     | non-VTI<br>growth (n=17) | VTI growth<br>(n=24) | p     |
|---------------------|-----------------------------|----------------------|-------|--------------------------|----------------------|-------|
|                     | Preoperative                |                      |       | Postoperative            |                      |       |
| Creatinine (mmol/l) | 83.2 (13.3)                 | 85.5 (9.8)           | 0.381 | 78.1 (21.2)              | 93.5 (38.7)          | 0.07  |
| BUN (umol/l)        | 5.9 (1.9)                   | 6.3 (4.3)            | 0.235 | 4.75 (3.2)               | 6.4 (2.3)            | 0.02  |
| AST (U/l)           | 22.1 (4.3)                  | 34.1 (10.1)          | 0.135 | 55.6 (19.8)              | 47.5 (19.9)          | 0.297 |

|                      |             |             |       |             |             |       |
|----------------------|-------------|-------------|-------|-------------|-------------|-------|
| ALT (U/l)            | 20.3 (11.1) | 22.8 (4.9)  | 0.303 | 24.1 (10.1) | 18.5 (8.9)  | 0.103 |
| Bilirubin (umol/l)   | 11.04 (6.1) | 11.07 (7.1) | 0.462 | 11.3 (6.2)  | 11.1 (5.9)  | 0.368 |
| GGT (U/l)            | 35.5 (11.1) | 32.9 (13.2) | 0.103 | 43.4 (9.1)  | 22.8 (8.9)  | 0.301 |
| GFR (ml/min/1.73 m2) | 71.2 (13.4) | 65.3 (23.3) | 0.112 | 74.4 (14.3) | 55.1 (19.8) | 0.001 |

BUN: blood urea nitrogen

GFR: glomerular filtration rate

AST: aspartate aminotransferase

ALT: alanine aminotransferase

GGT: gamma-glutamyl transferase

GFR: glomerular filtration rate

Supplement S3: Laboratory parameters (mean or median (IQR or SD))
